# Supplementary material for: Capability of fs-LA-ICP-MS for sulfide analysis in comparison to ns-LA-ICP-MS: reduction of laser induced matrix effects?
Source: Royal Society of Chemistry journal article supplement (doi:10.1039/c5ja00251f), 2015-01-01
Supplement: c5ja00251f1.pdf [file c5ja00251f1.pdf]

### Capability of fs-LA-ICP-MS for sulfide analysis in comparison to ns-LA-ICP-MS: Reduction of laser induced matrix effects?

Cora C. Wohlgemuth-Ueberwasser and Klaus Peter Jochum

Electronic Supplementary Information

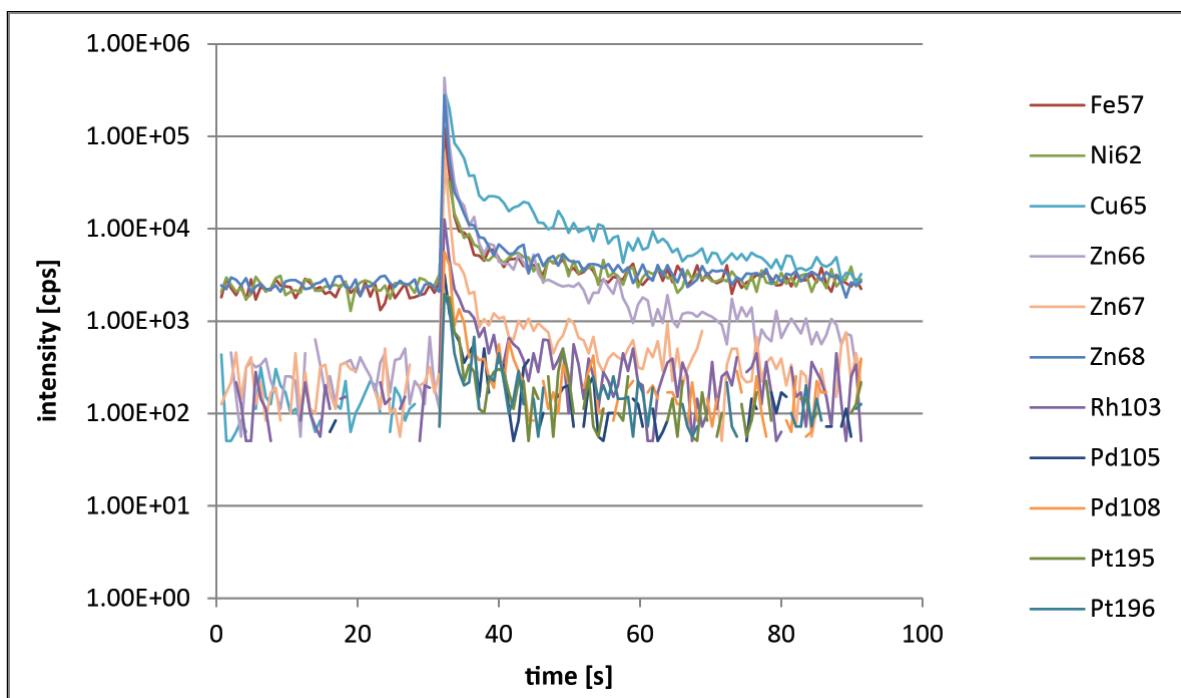

Figure S1
